# Supplementary material for: Activated Histone Acetyltransferase p300/CBP-Related Signalling Pathways Mediate Up-Regulation of NADPH Oxidase, Inflammation, and Fibrosis in Diabetic Kidney
Source: MDPI journal article supplement (doi:10.3390/antiox10091356), 2021-08-26
Supplement: s1 [file s1]

| Gene                            | GeneBank®<br>Accession Number | Sequences of oligonucleotide primers                                   |
|---------------------------------|-------------------------------|------------------------------------------------------------------------|
| <b>Nox1</b>                     | NM_172203.2                   | S: 5'-CATCCAGTCTCCAAACATGACA-3'<br>A: 5'-GCTACAGTGGCAATCACTCCAG-3'     |
| <b>Nox2</b>                     | FJ168469.1                    | S: 5'-ACTCCTTGGGTCAGCACTGG-3'<br>A: 5'-G TTCCTGTCCAGTTGTCTTCG-3'       |
| <b>Nox4</b>                     | AF276957.1                    | S: 5'-TGA ACTACAGTGAAGATTTCCTTGAAC-3'<br>A: 5'-GACACCCGTCAGACCAGGAA-3' |
| <b>MCP-1</b>                    | NM_011333.3                   | S: 5'-CAGCCAGATGCAGTTAACGC-3'<br>A: 5'-GCCTACTCATTGGGATCATCTTG-3'      |
| <b>TNF<math>\alpha</math></b>   | NM_013693.3                   | S: 5'-TCACCCACACCGTCAGCCGATTT-3'<br>A: 5'-CACCCATTCCCTTCACAGAGCAA-3'   |
| <b>NOS2</b>                     | NM_010927.4                   | S: 5'-CAAGCACCTTGG AAGAGGAG-3'<br>A: 5'-AAGGCCAAACACAGCATACC-3'        |
| <b>ICAM-1</b>                   | NM_010493.3                   | S: 5'-TGC GTTTTGGAGCTAGCGGACCA-3<br>A: 5'-CGAGGACCATA CAGCACGTGCAG-3'  |
| <b>VCAM-1</b>                   | NM_011693.3                   | S: 5'-CCTCACTTGCAGCACTACGGGCT-3'<br>A: 5'-TTTTCCAATATCCTCAATGACGGG-3'  |
| <b>E-selectin</b>               | NM_011345.2                   | S: 5'-CCAATCTGAAACATT CACCGAGT-3'<br>A: 5'-CGAGTCTTTGGTTCGTTGGATG-3'   |
| <b>COL4A1</b>                   | NR_133670.1                   | S: 5'-ATCTCTGGGGACAACATCCG-3'<br>A: 5'-CATCTCGCTTCTCTCTATGGTG-3'       |
| <b>Fibronectin</b>              | NM_010233.2                   | S: 5'-AAGACCATACCTGCCGAATG-3'<br>A: 5'-GAACATGACCGATTTGGACC-3'         |
| <b>Laminin</b>                  | NM_008480.2                   | S: 5'-TTACGTGGGTGGATTGCCTCAT-3'<br>A: 5'-TG TTCCTGTCCATCACTGTAGG-3'    |
| <b><math>\beta</math>-Actin</b> | NM_007393.5                   | S: 5'-CGTGAAAAGATGACCCAGATCA-3'<br>A: 5'-TGGTACGACCAGAGGCATACAG-3'     |

*S, sense; A, antisense*

**Table S1.** Sequences and GenBank® accession number of oligonucleotide primers used in real-time PCR assays.
